# Supplementary material
Source: publisher figshare collection journal article supplement (https://acs.figshare.com/ndownloader/files/4457710)
Supplement: Supplementary file 1 [file 4457710]

Online Figure 1

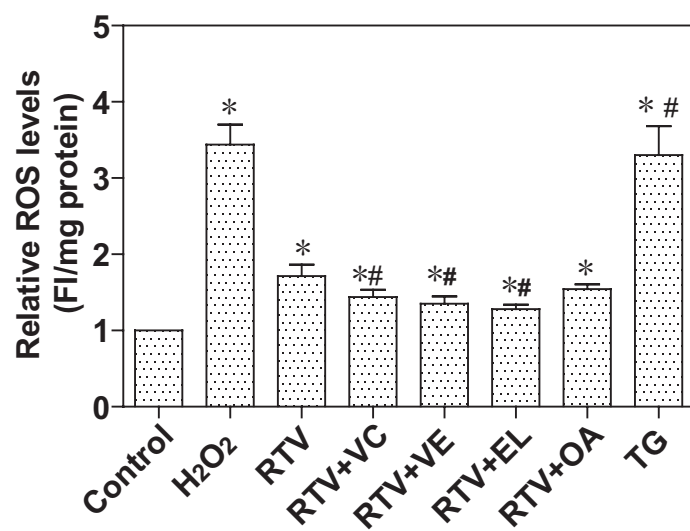

Online Figure 2

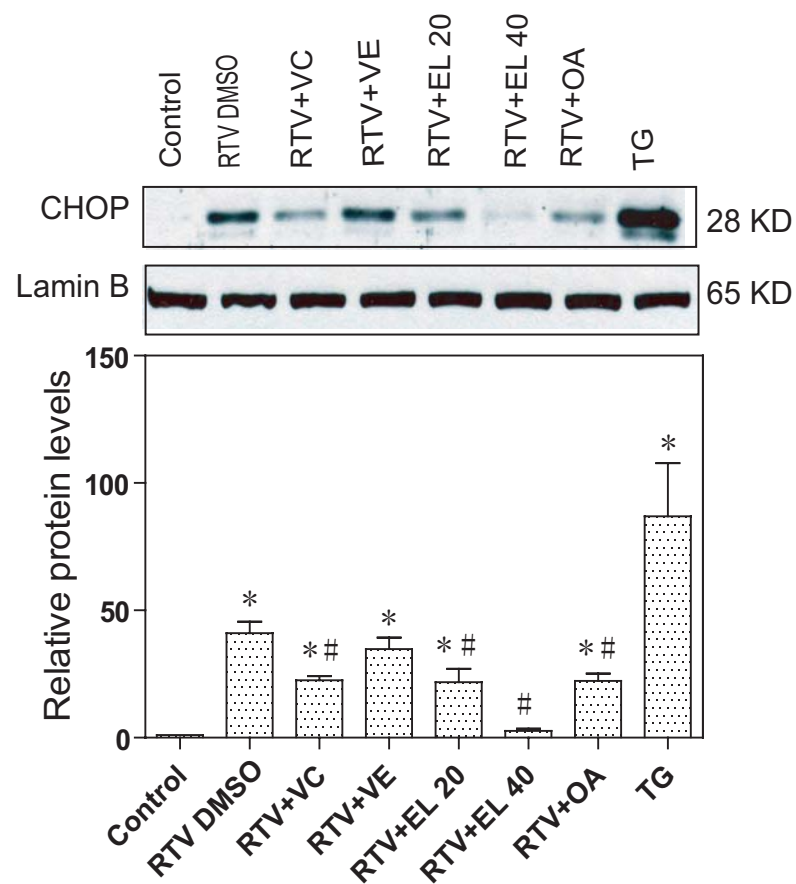

Online Figure 3

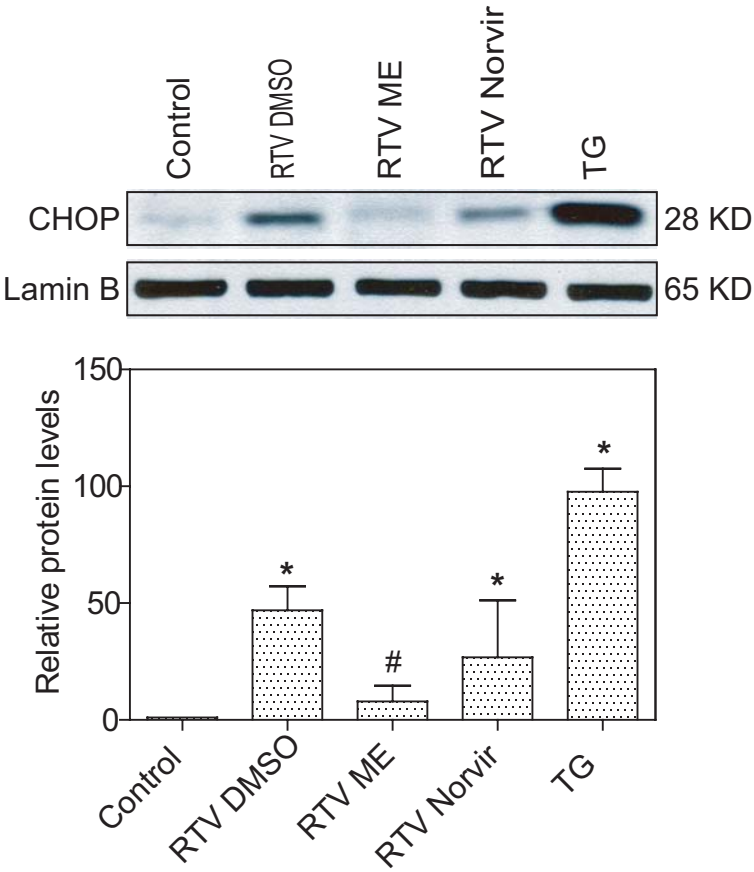

Online Figure 4

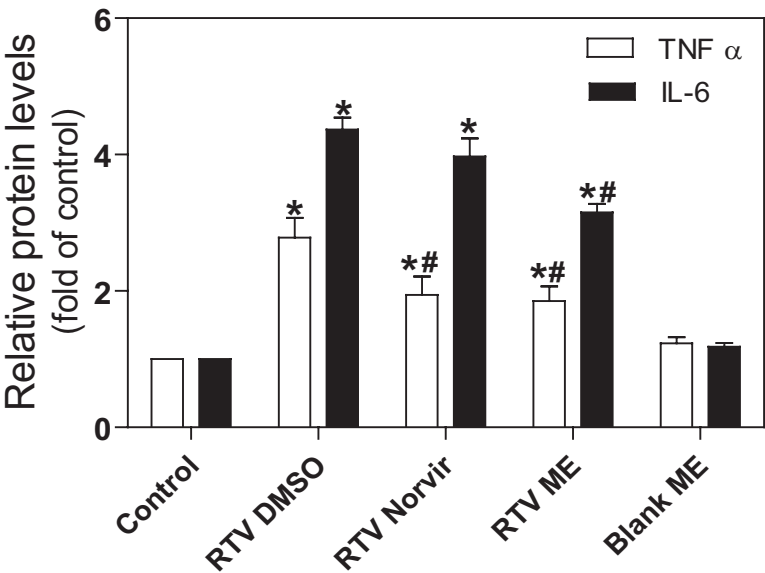

## Online Figure 5

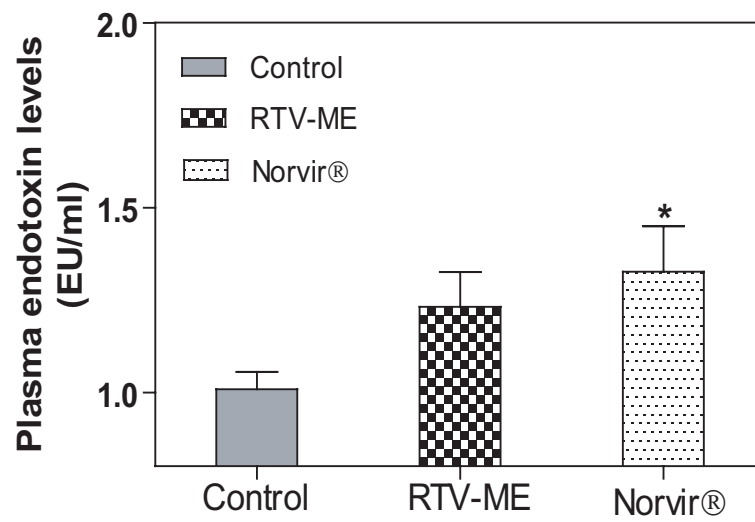

## ONLINE SUPPLEMENTAL FIGURE LEGENDS

### **Figure 1. Effect of antioxidants on ritonavir-induced ROS production in macrophages.**

Mouse Raw264.7 cells were treated with vehicle control (DMSO), positive control (H<sub>2</sub>O<sub>2</sub>, 10  $\mu$ M), thapsigargin (TG, a known ER stress inducer, 100 nM), ritonavir (RTV, 15  $\mu$ M), RTV with vitamin C (VC 15  $\mu$ g/ml) or, vitamin E (VE 20  $\mu$ g/ml), or ethyl linoleate (EL, 20  $\mu$ g/ml) or oleic acid (OA, 10  $\mu$ g/ml) for 4h. The intracellular ROS levels were measured as described in “Methods”. Values are mean  $\pm$  SD of 3 independent experiments and analyzed using one-way ANOVA. Statistical significance relative to control, \* $p$  < 0.05 or relative to RTV, # $p$ <0.05.

### **Figure 2. Effect of antioxidants on ritonavir-induced UPR activation in macrophages.**

Representative immunoblots against CHOP and lamin B from the nuclear extracts of mouse raw264.7 cells treated with ritonavir (RTV, 15  $\mu$ M) in the absence or presence of individual antioxidant, vitamin C (VC 15  $\mu$ g/ml) or, vitamin E (VE 20  $\mu$ g/ml), or ethyl linoleate (EL, 20  $\mu$ g/ml or 40  $\mu$ g/ml) or oleic acid (OA, 10  $\mu$ g/ml) for 4 h. Lamin B was used as a loading control of nuclear protein. Relative protein levels of CHOP from three independent experiments. Statistical significance relative to control, \* $p$  < 0.05 or relative to RTV, # $p$ <0.05.

### **Figure 3. Effect of ritonavir SMEDDS on UPR activation in macrophages.**

Representative immunoblots against CHOP and lamin B from the nuclear extracts of mouse RAW264.7 cells treated with vehicle control (DMSO), ritonavir in DMSO (RTV DMSO, 15  $\mu$ M), ritonavir SMEDDS (RTV ME, 15  $\mu$ M) or Norvir® (15  $\mu$ M), or TG (25 nM) for 4 h. Lamin B was used as a loading control of nuclear protein. Relative protein levels of CHOP from three independent experiments were analyzed. Statistical significance relative to control,

\* $p < 0.05$  or relative to RTV DMSO, # $p < 0.05$ .

**Figure 4. Effect of ritonavir SMEDDS on TNF- $\alpha$  and IL-6 expression in macrophages.**

Mouse Raw264.7 cells were treated with 15  $\mu$ M of ritonavir in DMSO, ritonavir SMEDDS or Norvir® or the same amount of vehicle control for 24 h. The TNF- $\alpha$  and IL-6 levels in medium were determined by ELISA as described in “Methods”. The total amounts of TNF- $\alpha$  and IL-6 in media were normalized to the total protein amounts of the viable cells. Relative protein levels of TNF- $\alpha$  and IL-6 from three independent experiments were analyzed. Statistical significance relative to control, \* $p < 0.05$  or relative to RTV DMSO, # $p < 0.05$ .

**Figure 5. Effect of ritonavir SMEDDS and Norvir® on gut microbial translocation *in vivo*.** Wild type C57BL/6 mice were treated with control solution (PBS), ritonavir SMEDDS (RTV ME) or Norvir® (50 mg/kg) for 4 weeks. The plasma endotoxin levels were determined using LAL Endotoxin Assay Kit (from GeneScript). Statistical significance relative to control (n=5), \* $p < 0.05$ .
